# Supplementary material for: Intrinsic defect formation and the effect of transition metal doping on transport properties in a ductile thermoelectric material α-Ag2S: a first-principles study
Source: Royal Society of Chemistry journal article supplement (doi:10.1039/d0cp06624a), 2021-01-01
Supplement: d0cp06624a1.pdf [file d0cp06624a1.pdf]

## SUPPLEMENTARY DATA

### Intrinsic defect formation and effect of transition metals doping on transport property in ductile thermoelectric material $\alpha$ -Ag<sub>2</sub>S: First-principles study

Ho Ngoc Nam,<sup>\*ac</sup> Ryo Yamada,<sup>b</sup> Haruki Okumura,<sup>c</sup> Tien Quang Nguyen,<sup>c</sup> Katsuhiro Suzuki,<sup>c</sup> Hikari Shinya,<sup>def</sup> Akira Masago,<sup>e</sup> Tetsuya Fukushima<sup>eg</sup> and Kazunori Sato<sup>ce</sup>

<sup>a</sup>Department of Precision Science and Technology, Graduate School of Engineering, Osaka University, 2-1 Yamadaoka, Suita, Osaka 565-0871, Japan

<sup>b</sup>Division of Materials Science and Engineering, Faculty of Engineering, Hokkaido University, Kita 13 Nishi 8, Kita-ku, Sapporo, Hokkaido 060-8628, Japan

<sup>c</sup>Division of Materials and Manufacturing Science, Graduate School of Engineering, Osaka University, 2-1 Yamadaoka, Suita, Osaka 565-0871, Japan

<sup>d</sup>Research Institute of Electrical Communication, Tohoku University, Sendai 980-8577, Japan

<sup>e</sup>Center for Spintronics Research network, Graduate School of Engineering Science, Osaka University, Toyonaka, Osaka 560-8531, Japan

<sup>f</sup>Center for Spintronics Research Network, Tohoku University, Sendai, Miyagi 980-8577, Japan

<sup>g</sup>Institute of Solid State Physics, The University of Tokyo, 5-1-5 Kashiwanoha, Kashiwa, Chiba, 277-8581, Japan

\*Email: honam@mat.eng.osaka-u.ac.jp

#### I. Checking the effect of the mixing parameter and screening parameter of the hybrid functional on bandgap energy in $\alpha$ -Ag<sub>2</sub>S

Hybrid functionals are the combination between DFT exchange-correlation energy functional and a portion of exact exchange from Hartree – Fock (HF) theory. Here, we used hybrid functional in the form of Heyd – Scuseria – Ernzerhof or HSE06 method for investigation:

$$E_{xc}^{\text{HSE}} = \alpha E_x^{\text{HF,SR}}(\omega) + (1-\alpha) E_x^{\text{PBE,SR}}(\omega) + E_x^{\text{PBE,LR}}(\omega) + E_c^{\text{PBE}}$$

where  $\alpha$  is the mixing parameter;  $\omega$  is screening parameter;  $E_x$  is the exchange functional;  $E_c$  is the correlation functional; SR and LR stand for the short-range and long-range parts of Coulomb potential. The mixing parameter  $\alpha$  and screening parameter  $\omega$  are chosen to be 0.25 and 0.2 for HSE06 standard, respectively. However, the bandgap energy in  $\alpha$ -Ag<sub>2</sub>S predicted by HSE06 is quite overestimated, which is double value compared to the experimental data. Usually, we can reproduce bandgap energy via controlling parameters  $\alpha$  and  $\omega$ . We have checked the effect of  $\alpha$  and  $\omega$  on  $E_g$  and the results are shown in **Fig. I**. It can be seen that experimentally reported

bandgap can be obtained by changing the two parameters. However, we recommend not to use this approach for calculations in a large supercell because it is massively time-consuming.

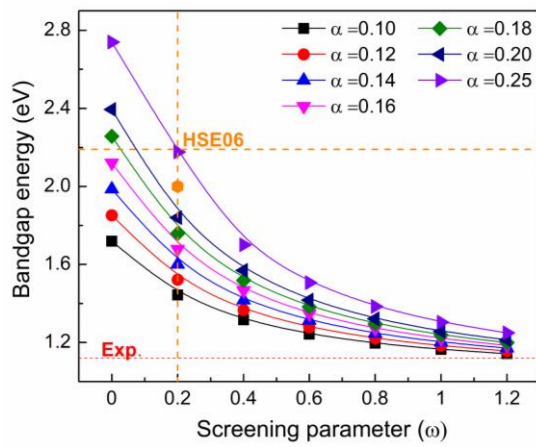

**Fig. I.** Bandgap energy dependence on  $\alpha$  and  $\omega$  in hybrid functional method

## II. Band structure of $\alpha$ -Ag<sub>2</sub>S using functional GGA-PBE

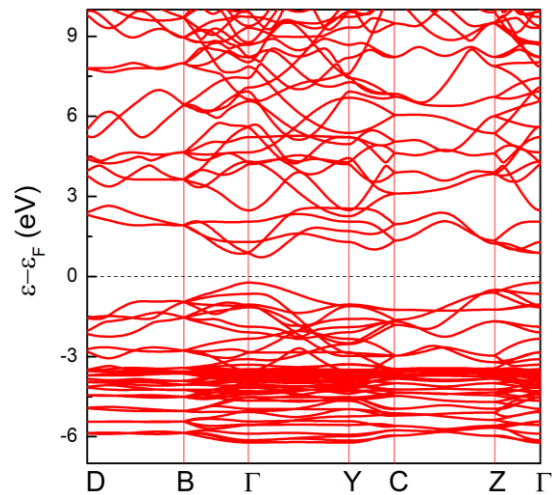

**Fig. II.** Band structure of  $\alpha$ -Ag<sub>2</sub>S using GGA-PBE shows the displacement of CBM from center of BZ

## III. Atomic configuration around sulfur vacancy:

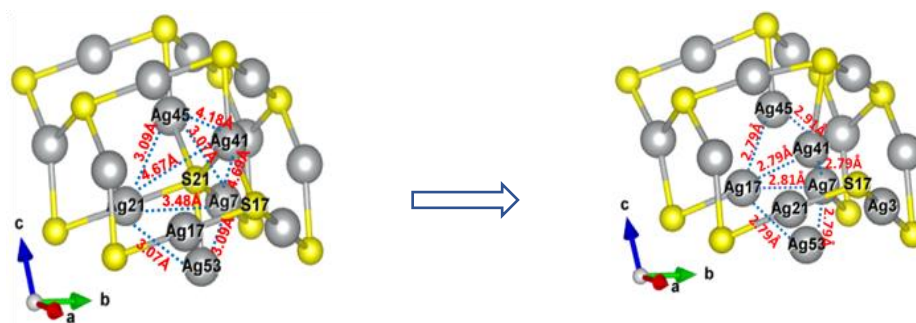

**Fig. III.** After removing the sulfur (S21) atom, the surrounding silver atoms tend to move closer together to form a silver cluster. Their bond lengths decrease from 3.09 Å to 2.79 Å, which is smaller than the shortest Ag-Ag bonds in the Ag fcc-bulk (about 2.87 Å).

#### IV. The directional anisotropy of Seebeck coefficient:

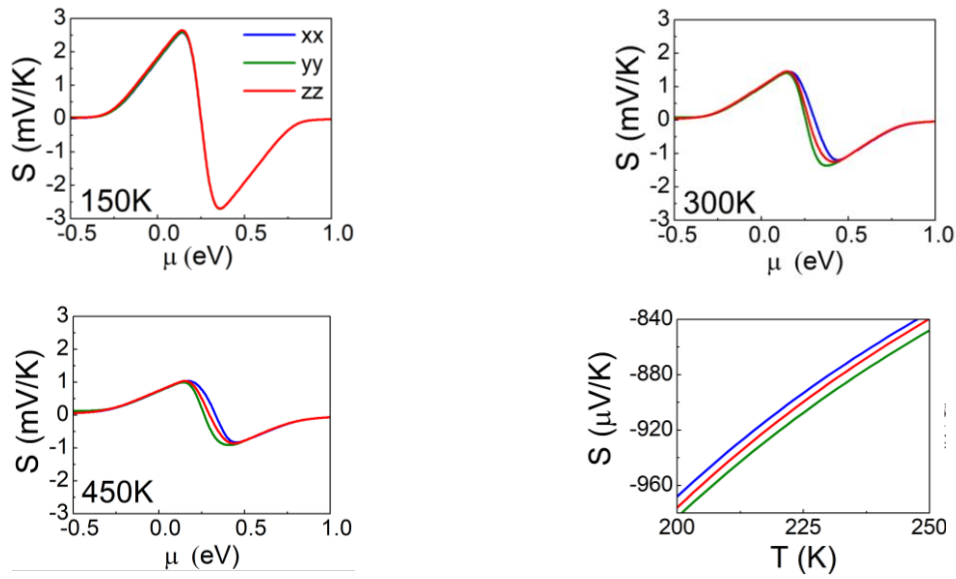

**Fig. IV.** Anisotropic nature of the Seebeck coefficients in  $\alpha$ -Ag<sub>2</sub>S are expressed as a function of the chemical potential. Here, we consider three representative temperatures: 150K, 300K, and 450K (phase transition to  $\beta$ -Ag<sub>2</sub>S occurs when the temperature is higher than 453K). Temperature-dependent Seebeck coefficients are also illustrated with deviations in value of about 10  $\mu$ V/K in different directions at  $n = 10^{14}$  cm<sup>-3</sup>.

#### V. The average value of Seebeck coefficient for anisotropic materials:

In material systems with cubic symmetry, the dependence of Seebeck coefficient ( $S$ ) on the crystal direction is negligible. However, in systems with different lattice parameters in each direction, the transport coefficients depend strongly on it (i.e., they are anisotropic). Therefore, it is necessary to quantify these values as an average value to compare with experimental data. Here, a simple circuit model is used to determine the average Seebeck coefficient in different directions. It should be noted that this formula is not always suitable for averaging, especially for systems with non-symmetric tensors. In the case of Ag<sub>2</sub>S system, the off-diagonal components are very small values only about 1% of diagonal components in magnitude. Therefore, we can safely ignore them in calculation of average Seebeck coefficient in this system by the following formula:

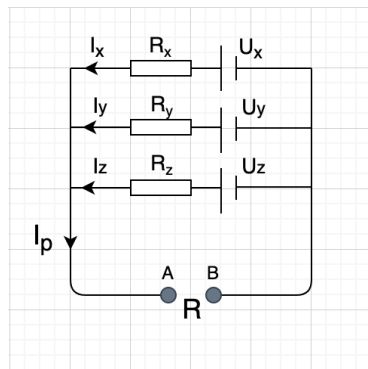

$$R_x = \frac{3L}{\sigma_{xx}S}; \quad U_x = S_{xx}\Delta T; \quad U_{AB} = I_p R = S_{poly}\Delta T;$$

$$U_{AB} = I_p R = U_x - I_x R_x = U_y - I_y R_y = U_z - I_z R_z$$

$$I_p = \frac{U_{AB}}{R} = I_x + I_y + I_z$$

$$\Leftrightarrow \frac{U_{AB}}{R} = \frac{U_x - U_{AB}}{R_x} + \frac{U_y - U_{AB}}{R_y} + \frac{U_z - U_{AB}}{R_z}$$

$$\Rightarrow U_{AB} = \frac{\frac{U_x}{R_x} + \frac{U_y}{R_y} + \frac{U_z}{R_z}}{\frac{1}{R} + \frac{1}{R_x} + \frac{1}{R_y} + \frac{1}{R_z}} = \frac{\frac{(S_{xx}\Delta T)}{(3L/\sigma_{xx}S)} + \frac{(S_{yy}\Delta T)}{(3L/\sigma_{yy}S)} + \frac{(S_{zz}\Delta T)}{(3L/\sigma_{zz}S)}}{\frac{\sigma_{xx}S}{3L} + \frac{\sigma_{yy}S}{3L} + \frac{\sigma_{zz}S}{3L}} \Rightarrow S_{poly} = \frac{S_{xx}\sigma_{xx} + S_{yy}\sigma_{yy} + S_{zz}\sigma_{zz}}{\sigma_{xx} + \sigma_{yy} + \sigma_{zz}}$$
